# Supplementary material
Source: publisher figshare collection journal article supplement (https://frontiersin.figshare.com/ndownloader/files/31110718)
Supplement: Supplementary file [file 31110718]

Supplemental Figure 1

A

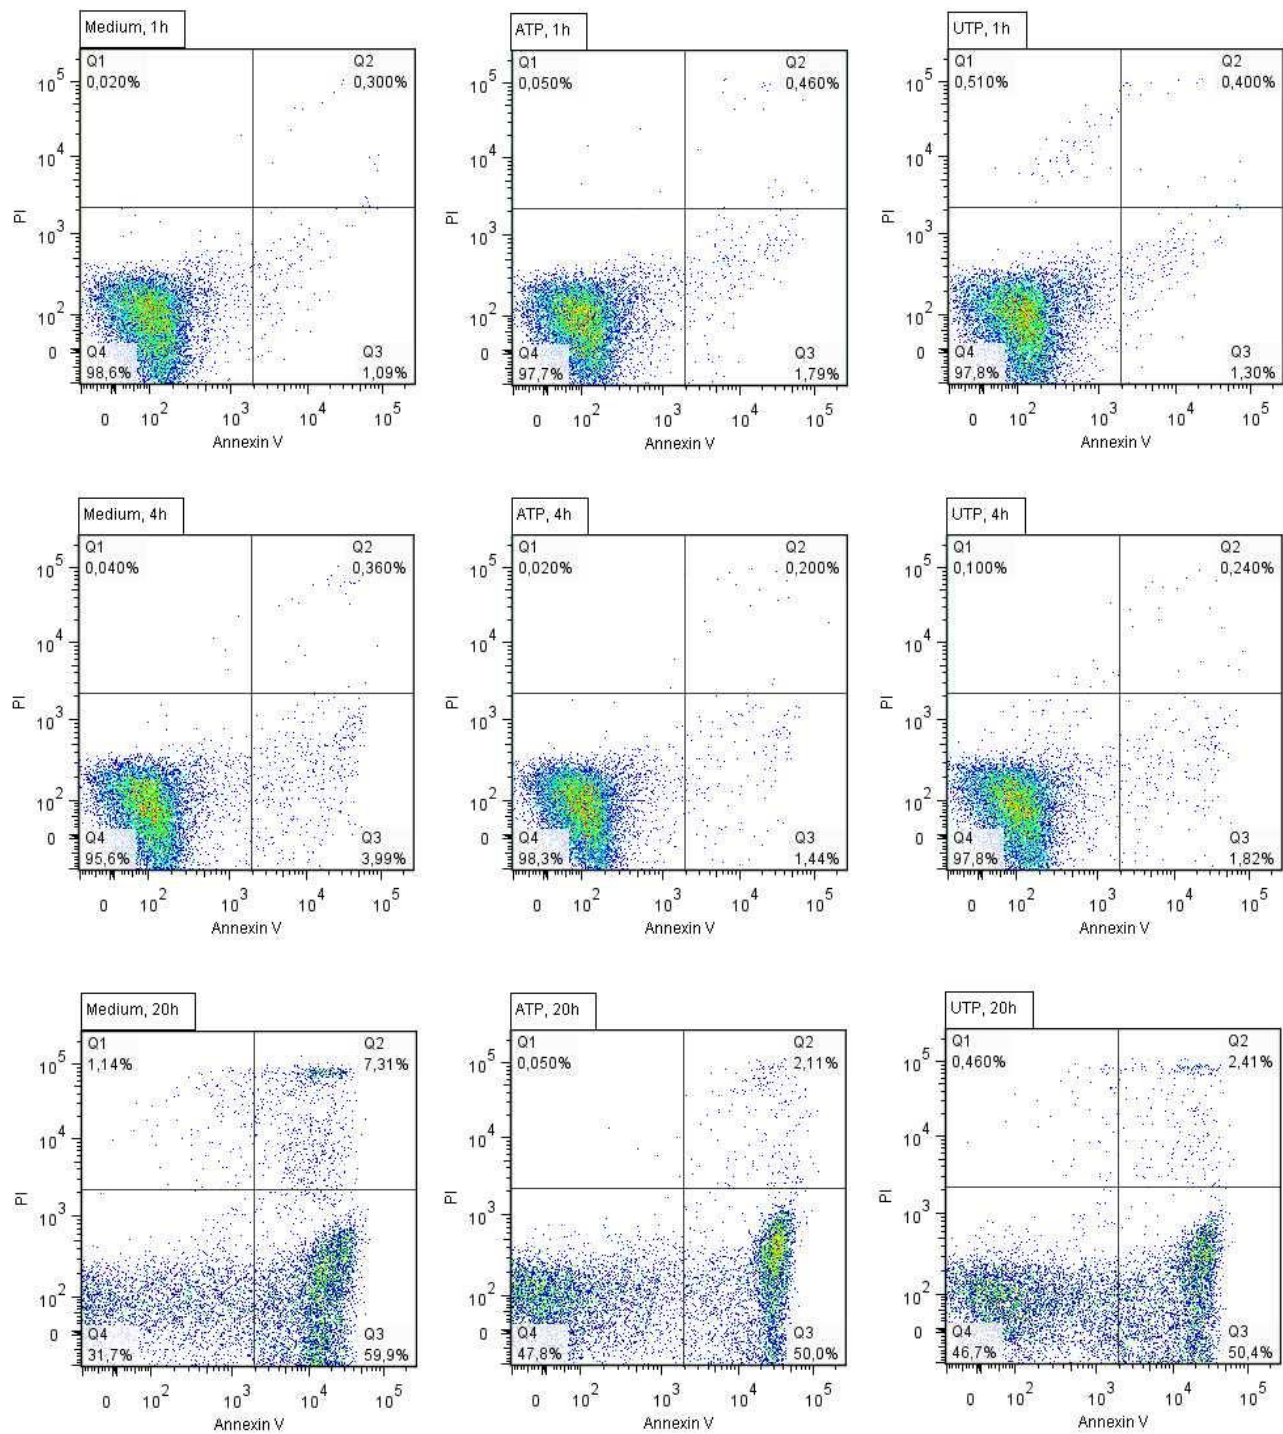

# B

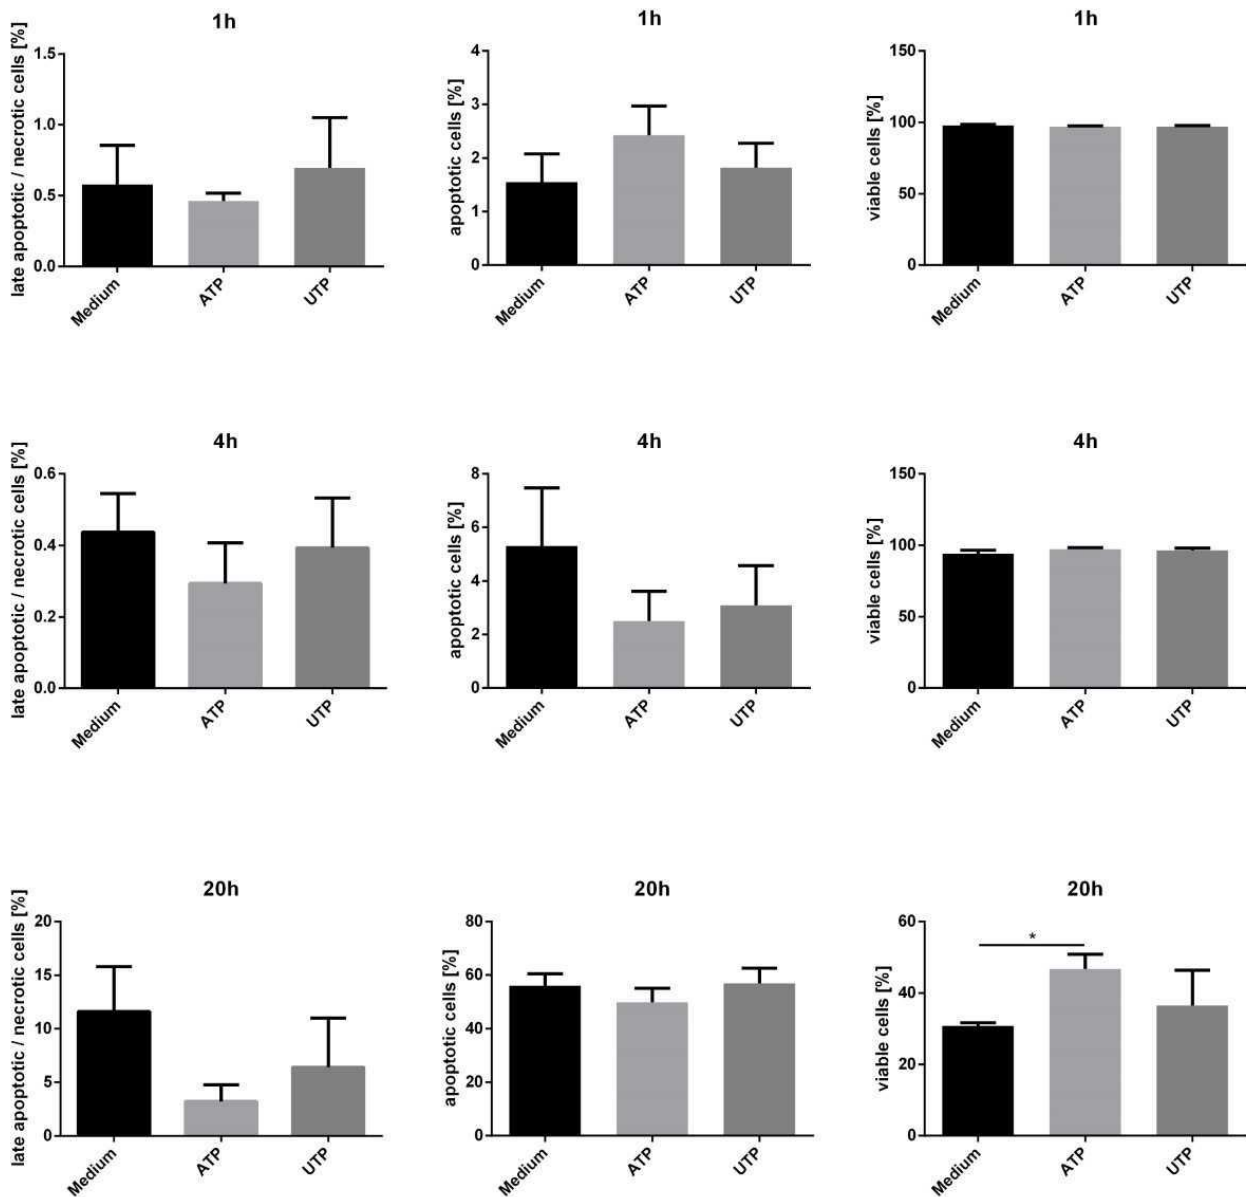

## Supplemental Figure S1

**The effect of extracellular ATP and UTP on the apoptosis and viability of primary human neutrophils.**

Primary human neutrophils were incubated for 1h, 4 h and 20h in the presence of ATP (500  $\mu$ M) or UTP (500  $\mu$ M). Apoptosis and necrosis of neutrophils was determined by staining with Annexin-V FLUOS and propidium iodide (PI), respectively, and analyzed by flow cytometry.

**A)** Representative dot plots. Double negative cells (Q1) represent viable cells. Annexin-V-positive PI-negative cells (Q4) represent apoptotic cells. Double positive cells (Q2) represent late apoptotic/necrotic cells. **B)** Bar diagrams showing the ratio of viable, apoptotic and late apoptotic/necrotic cells. n=3, \*=p $\leq$ 0,05
